# Supplementary material for: Mechanism of Ligilactobacillus salivarius GX118 in Regulating the Growth of Rainbow Trout (Oncorhynchus mykiss) and Resistance to Aeromonas salmonicida Infection
Source: MDPI journal article supplement (doi:10.3390/fishes9050157), 2024-04-27
Supplement: s1 [file s1]

**Table S1:** Assembly of *L. salivarius* GX118 genome.

| Attribute              | Indicators of GX118 |
|------------------------|---------------------|
| Genome size (bp)       | 2,034,343           |
| Gene number            | 2,005               |
| Gene length/Genome(%)  | 88.63               |
| Sequence GC%           | 32.63               |
| N50                    | 127,744             |
| Number of tRNA         | 66                  |
| Gls number             | 10                  |
| Number of Prophage     | 13                  |
| Number of T3PKS        | 1                   |
| Number of lassopeptide | 7                   |
| Number of CRISPR loci  | 2                   |

**Table S2:** The statistical estimates of alpha diversity of gut microbiota.

| Group | Shannon   | Simpson   | Chao1                       | ACE                         |
|-------|-----------|-----------|-----------------------------|-----------------------------|
| CK7   | 1.79±0.72 | 0.42±0.19 | 484.34±212.04 <sup>ab</sup> | 503.08±217.08 <sup>ab</sup> |
| A7    | 3.47±0.76 | 0.76±0.19 | 529.43±276.42 <sup>ab</sup> | 482.11±182.38 <sup>ab</sup> |
| B7    | 2.64±1.02 | 0.59±0.24 | 329.96±140.39 <sup>a</sup>  | 335.84±140.76 <sup>a</sup>  |
| CK14  | 2.55±1.86 | 0.55±0.41 | 370.73±109.83 <sup>a</sup>  | 389.06±107.22 <sup>a</sup>  |
| A14   | 1.71±1.08 | 0.41±0.32 | 451.58±79.84 <sup>ab</sup>  | 477.18±70.83 <sup>ab</sup>  |
| B14   | 1.65±0.55 | 0.32±0.12 | 329.61±125.76 <sup>a</sup>  | 341.35±132.99 <sup>a</sup>  |
| CK21  | 1.89±1.80 | 0.39±0.41 | 362.97±150.40 <sup>a</sup>  | 373.86±147.62 <sup>a</sup>  |
| A21   | 3.09±1.54 | 0.61±0.29 | 771.02±407.06 <sup>b</sup>  | 791.28±403.33 <sup>b</sup>  |
| B21   | 2.33±1.34 | 0.50±0.28 | 395.98±157.77 <sup>ab</sup> | 418.14±166.85 <sup>a</sup>  |

## A

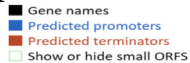

## B

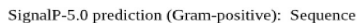

## C

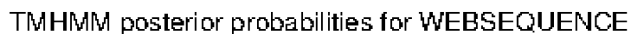

D

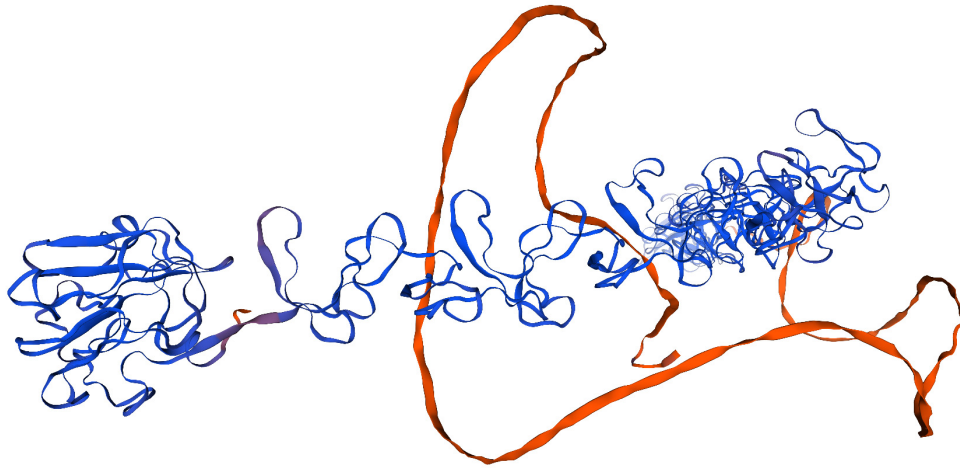

**Figure S1:** GX118 Bacteriocin Characteristics. (A) BAGEL4 software predicts bacteriocins. (B) Signal peptide prediction. (C) Transmembrane helix signalling. (D) Tertiary structural model of Enterolysin A.

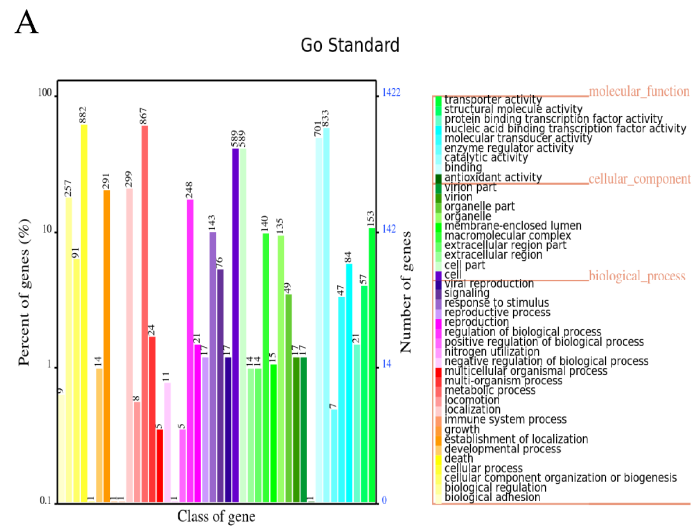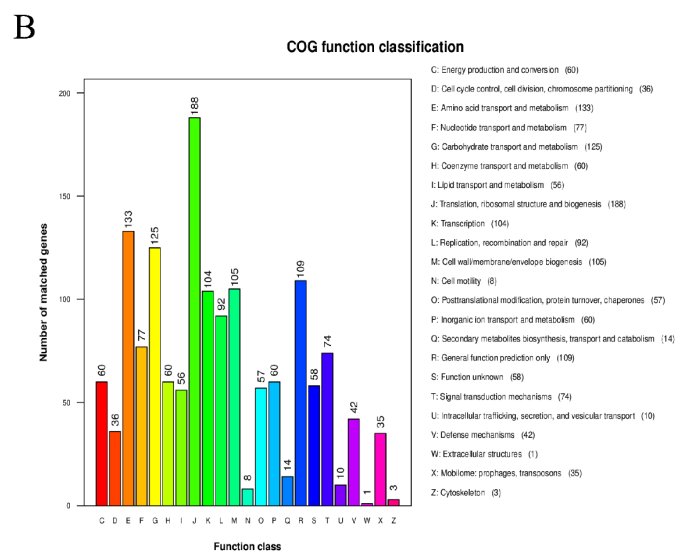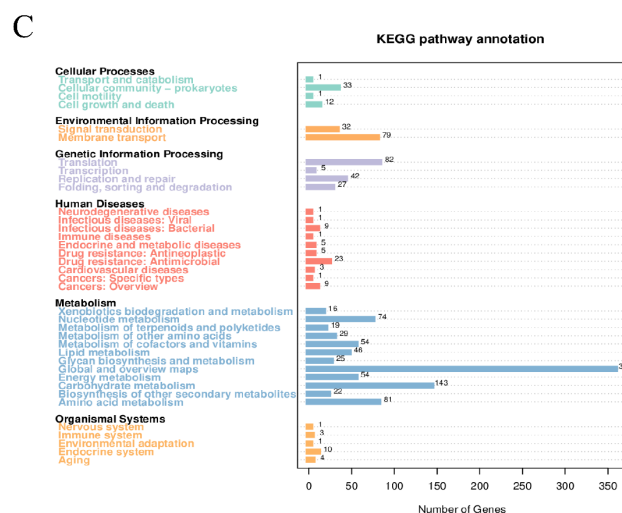

**Figure S2** Gene function annotation of GX1118: (A) GO database annotations. (B) COG Functional Classification. (C) Classification of KEGG metabolic pathways.

A

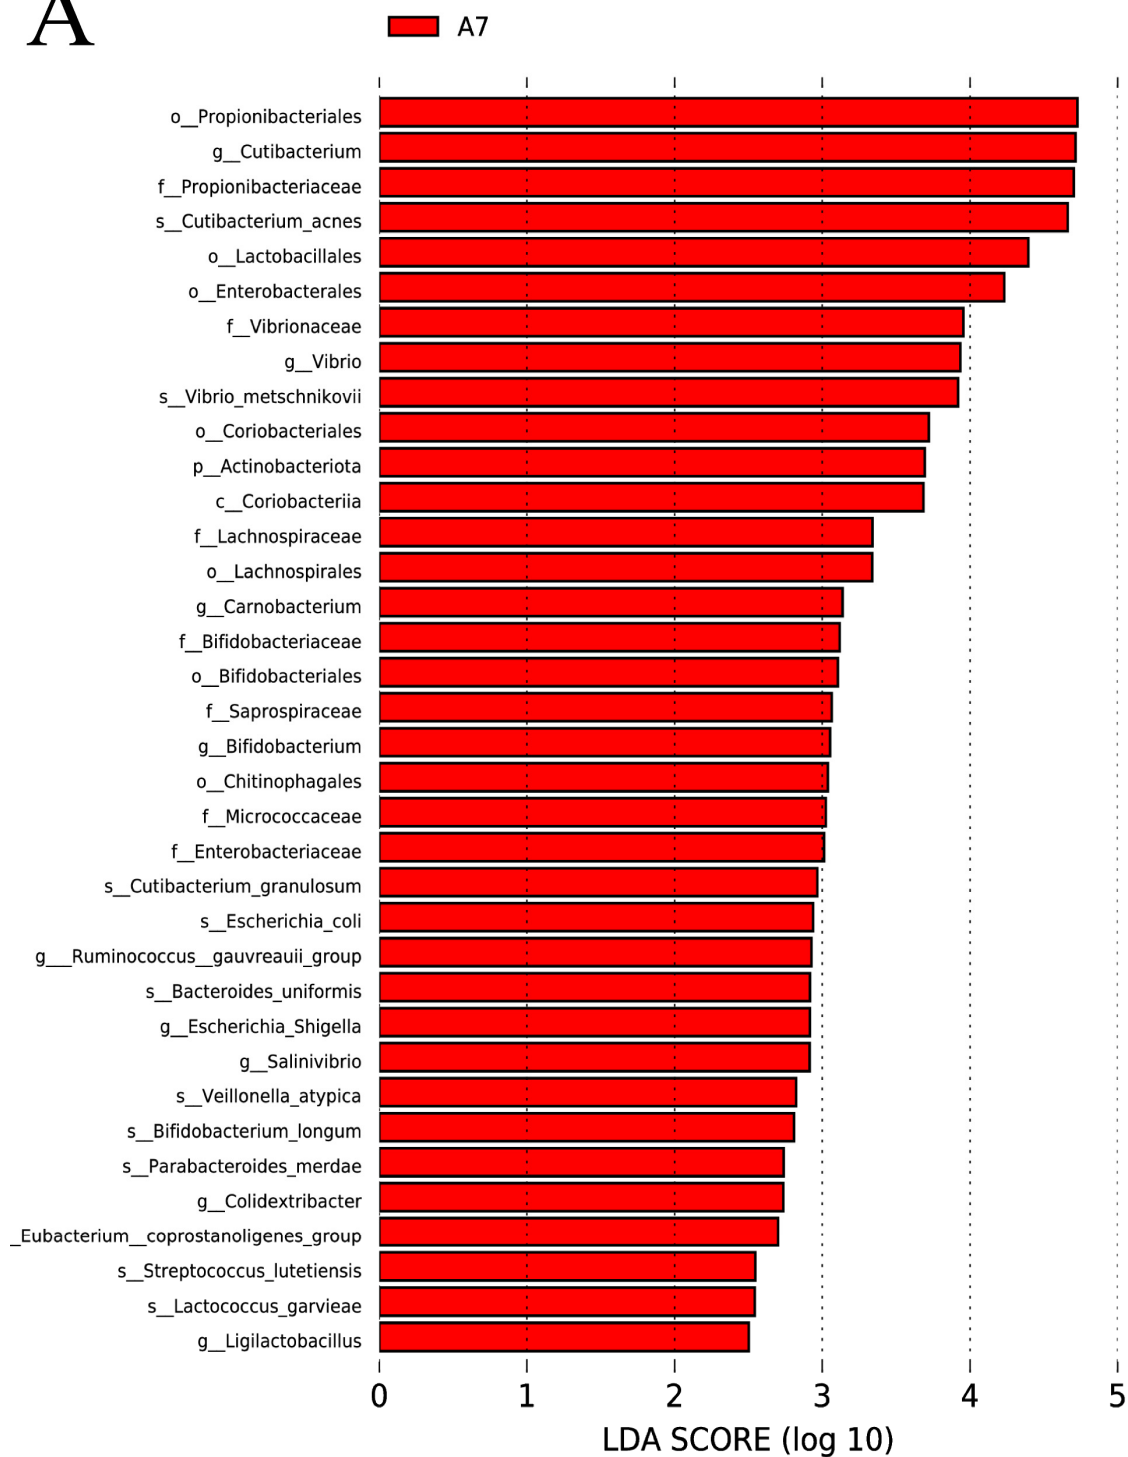

B

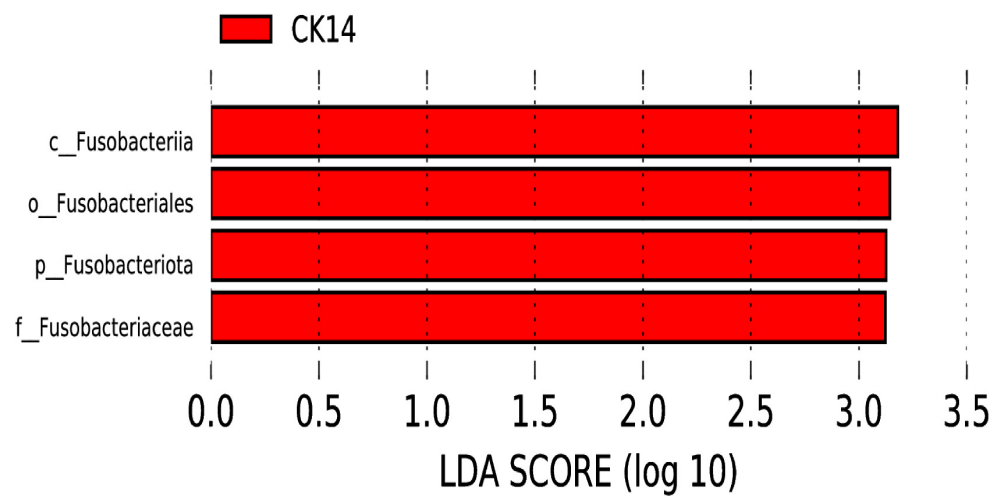

C

A21 CK21

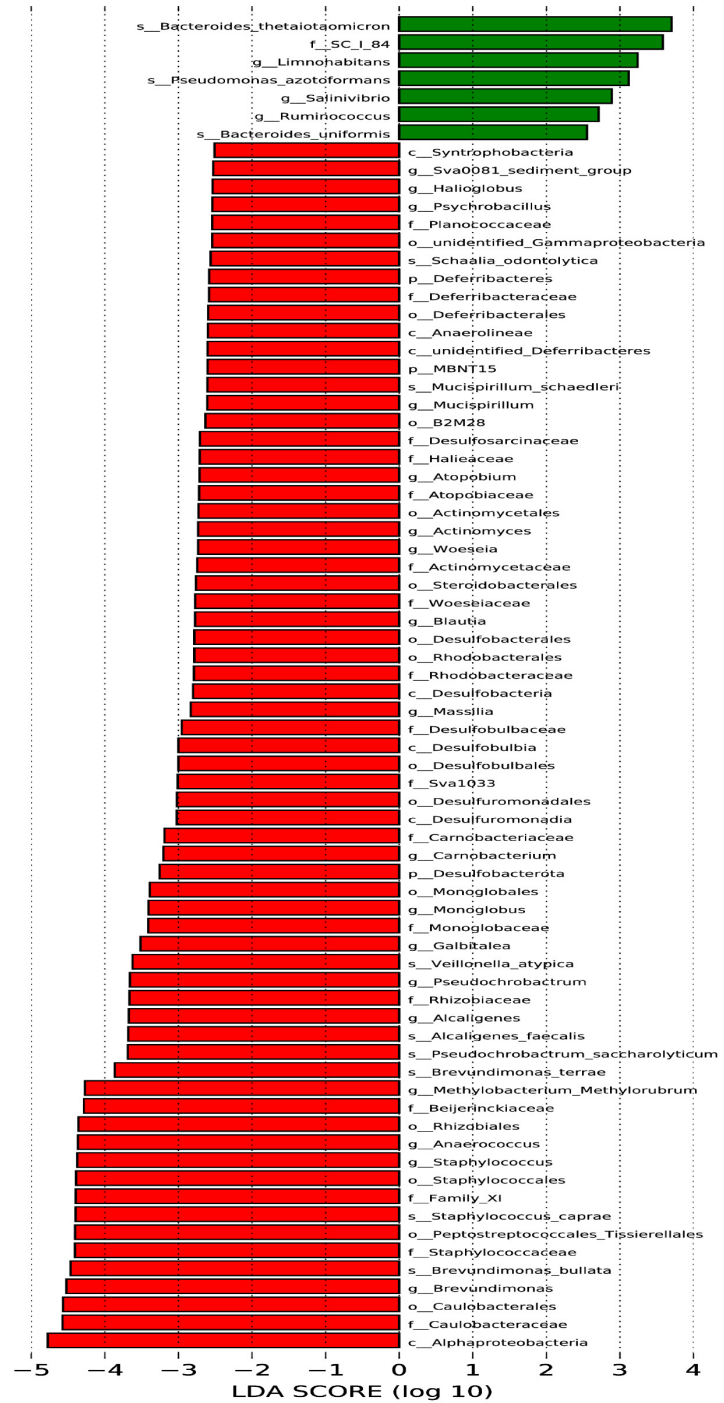

# D

■ B7

■ CK7

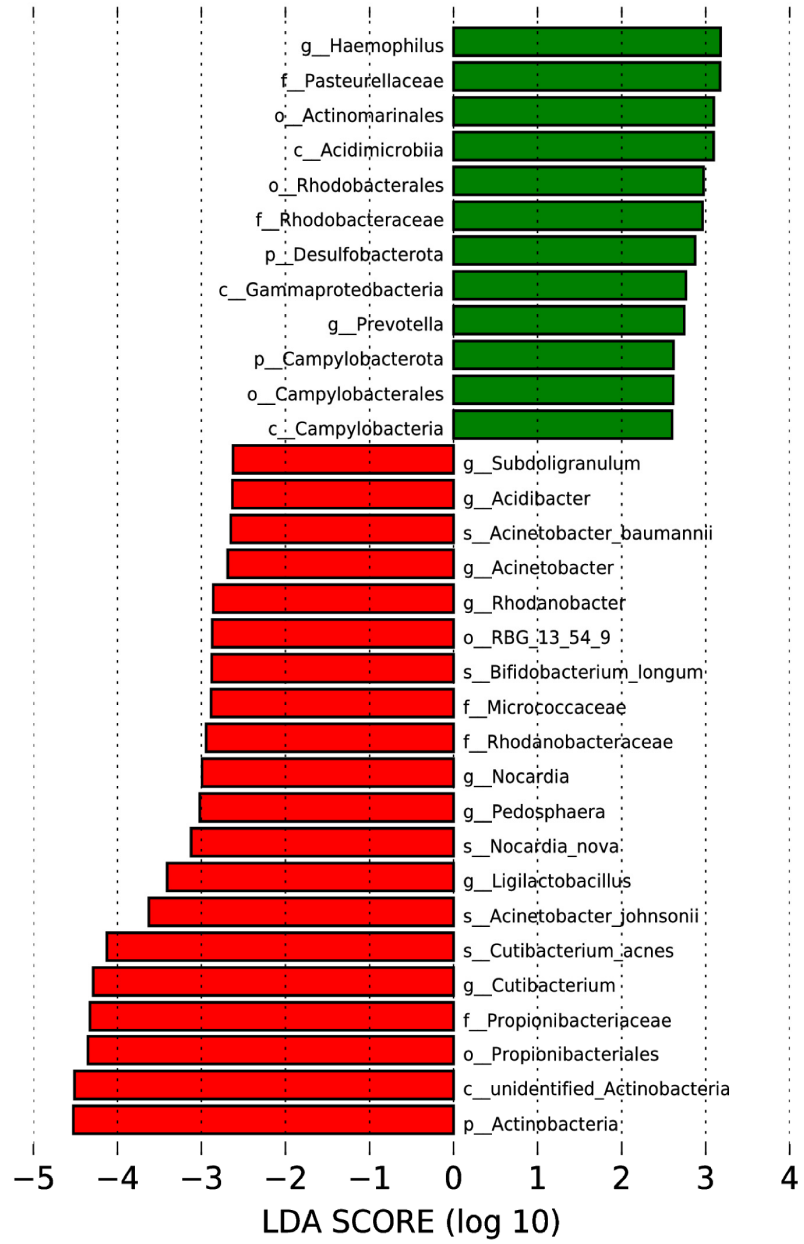



E

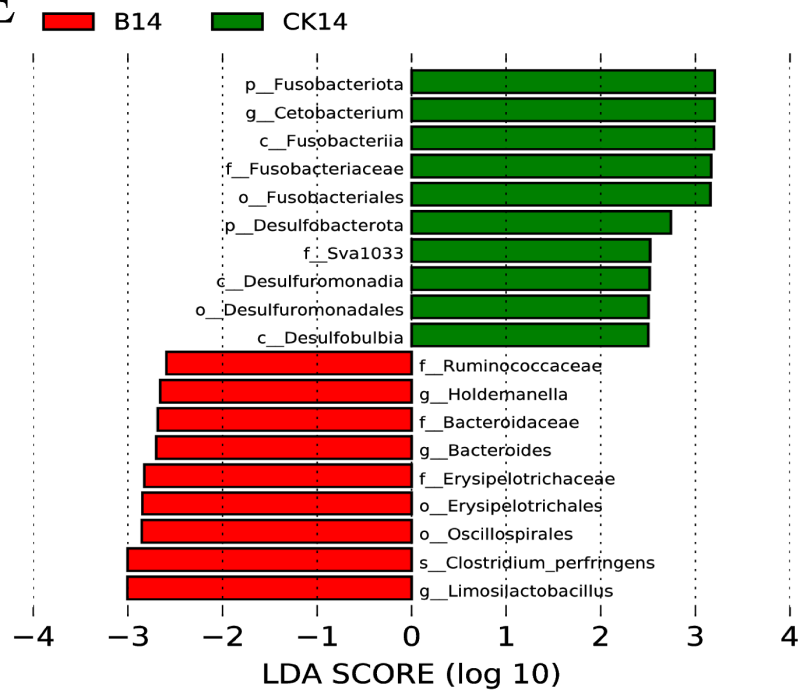

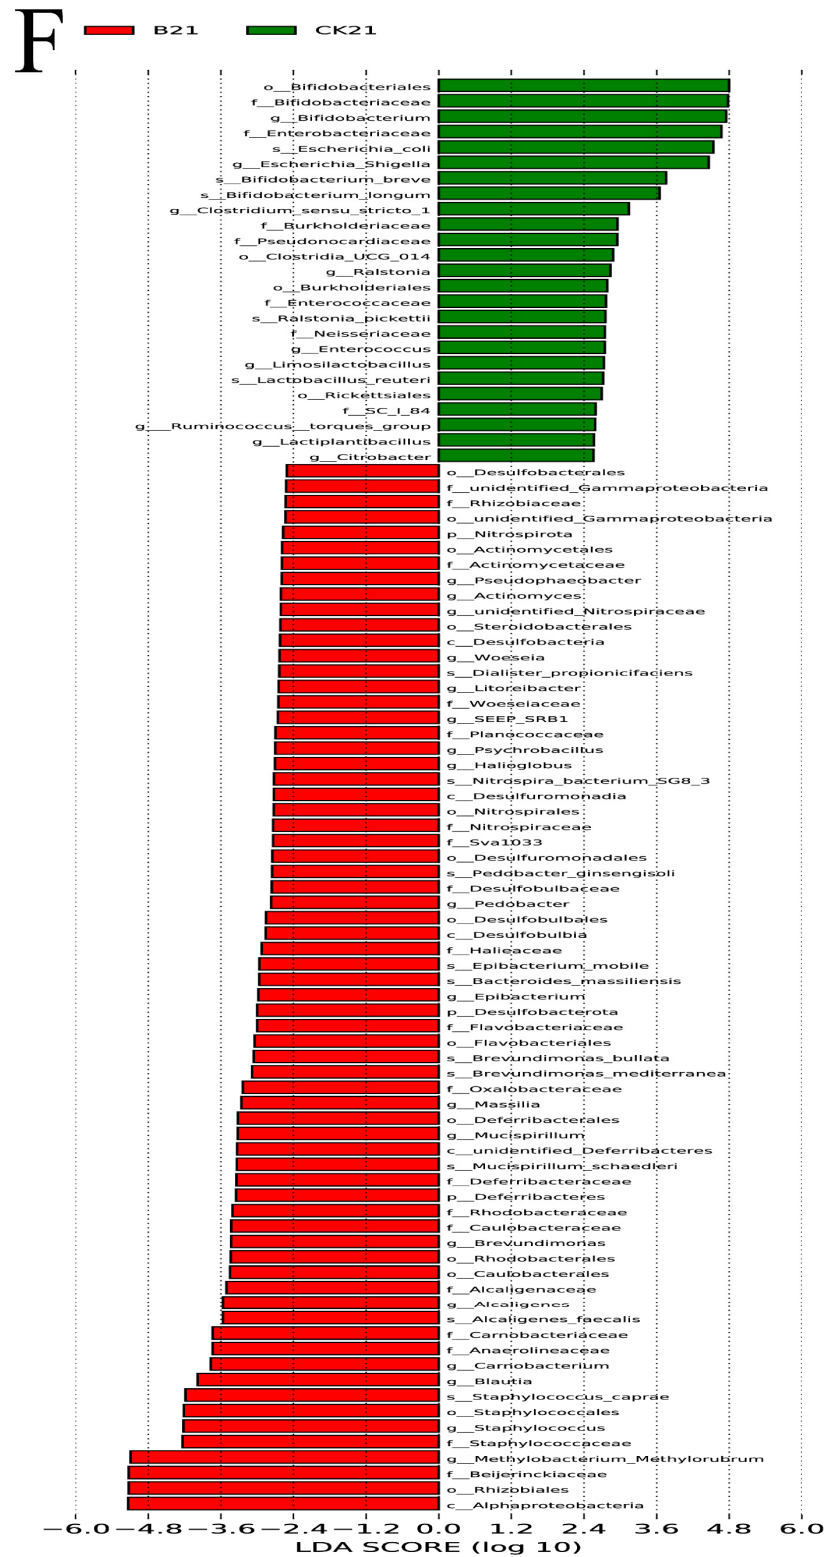

**Figure S3:** LEfSe analysis for differential abundant microbiota (LDA > 3,  $P < 0.05$ ). A7, A14 and A21: supplementation of  $10^7$  cfu/ml GX118 per kilogram diet at day 7, day 14 and day 21, respectively; B7, B14 and B21: supplementation of  $10^9$  cfu/ml GX118 per kilogram diet at day 7, day 14 and day 21, respectively, CK: control group.

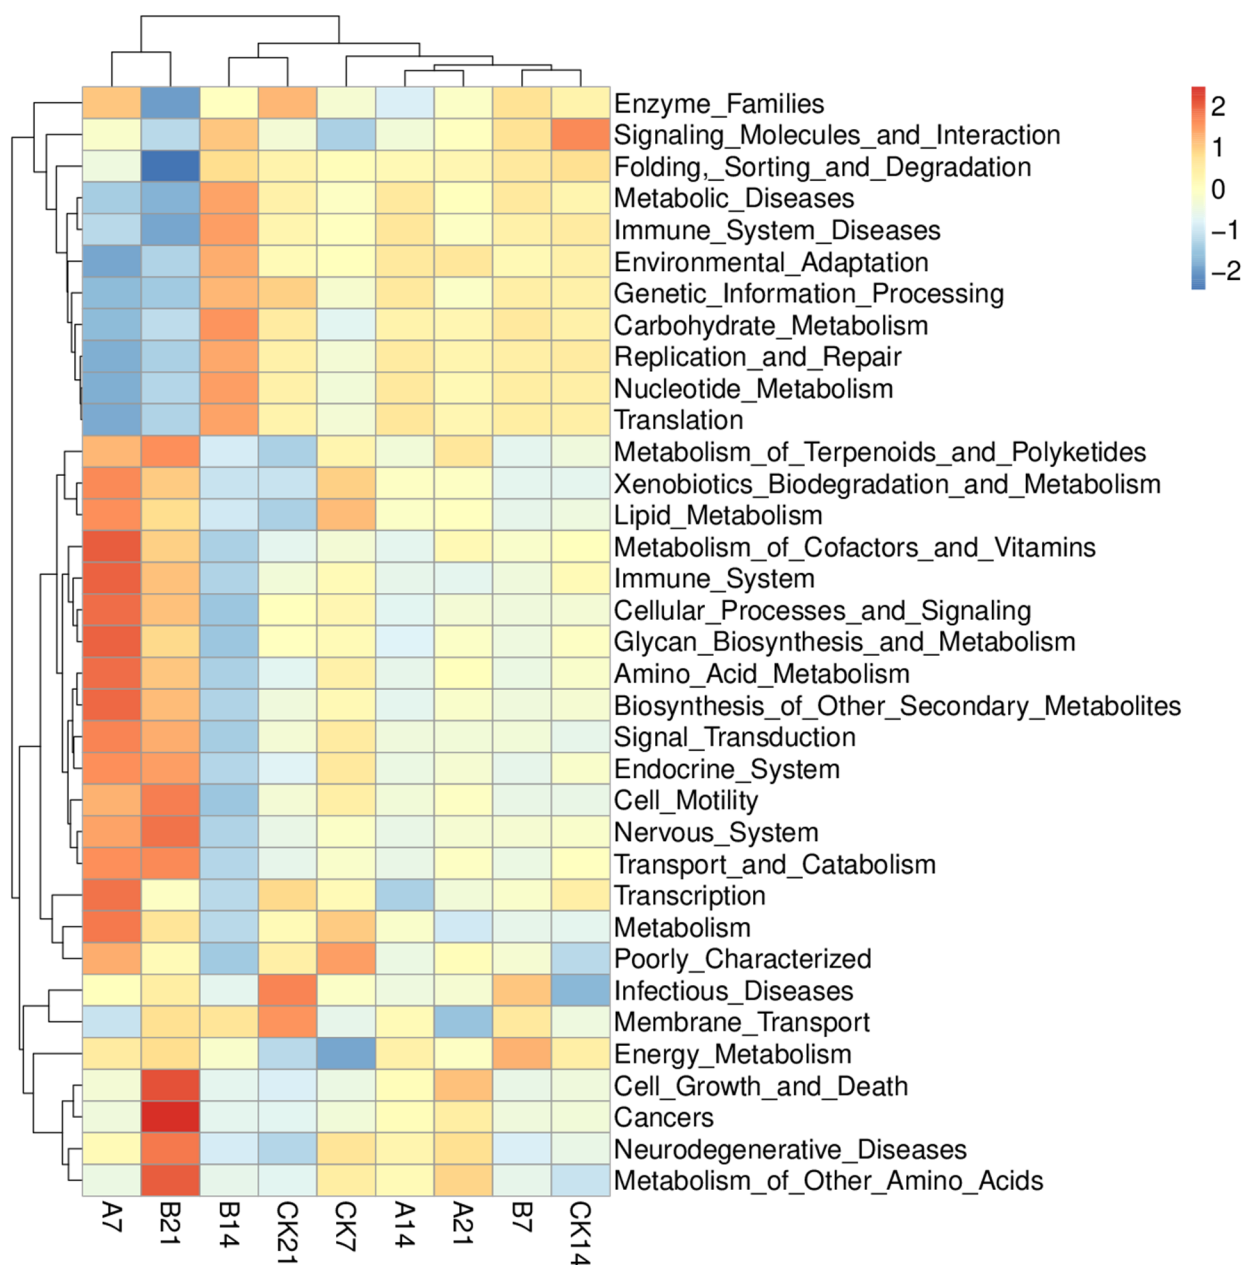

**Figure S4** KEGG pathway of gut microbiota predicted by Tax4Fun analysis (First 35 predicted pathways). A7, A14 and A21: supplementation of  $10^7$  cfu/ml GX118 per kilogram diet at day 7, day 14 and day 21, respectively; B7, B14 and B21: supplementation of  $10^9$  cfu/ml GX118 per kilogram diet at day 7, day 14 and day 21, respectively, CK: control group.
